# Supplementary figures and images for: Diversity and Geographical Structure of Xanthomonas citri pv. citri on Citrus in the South West Indian Ocean Region
Source: MDPI journal article supplement (doi:10.3390/microorganisms9050945), 2021-04-27

Strata GC1 GC2 GC3 GC4

Citron (*C. medica*) cv. Buddha's hand

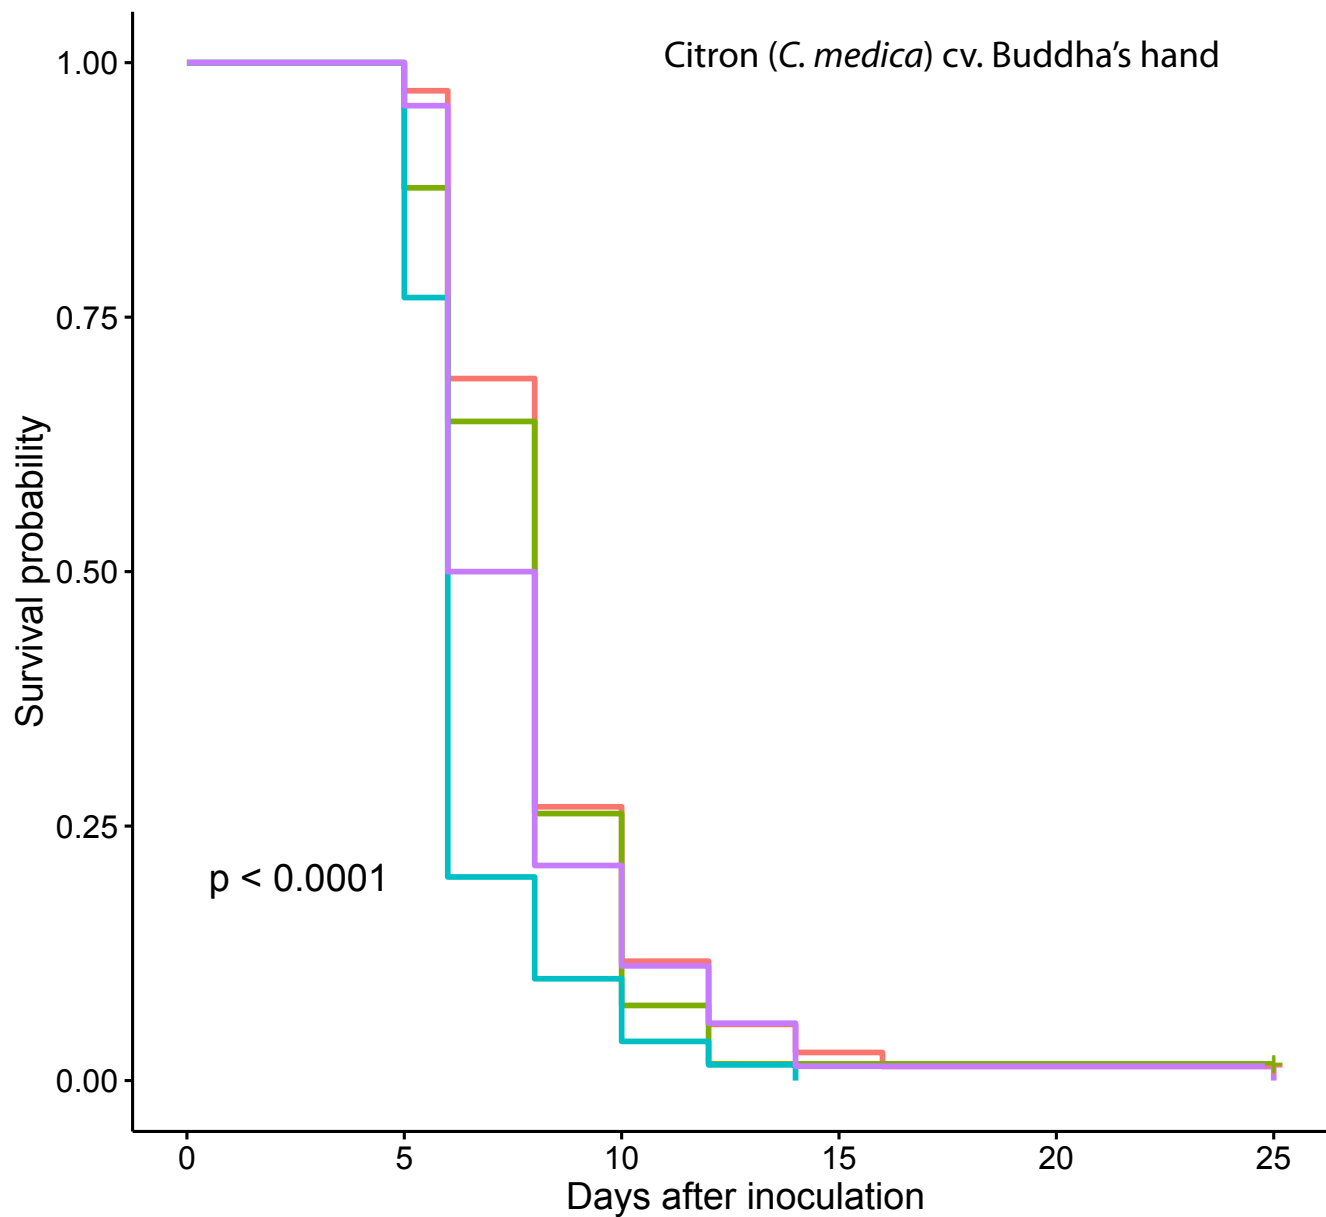

Supplement: s1 [file s1]

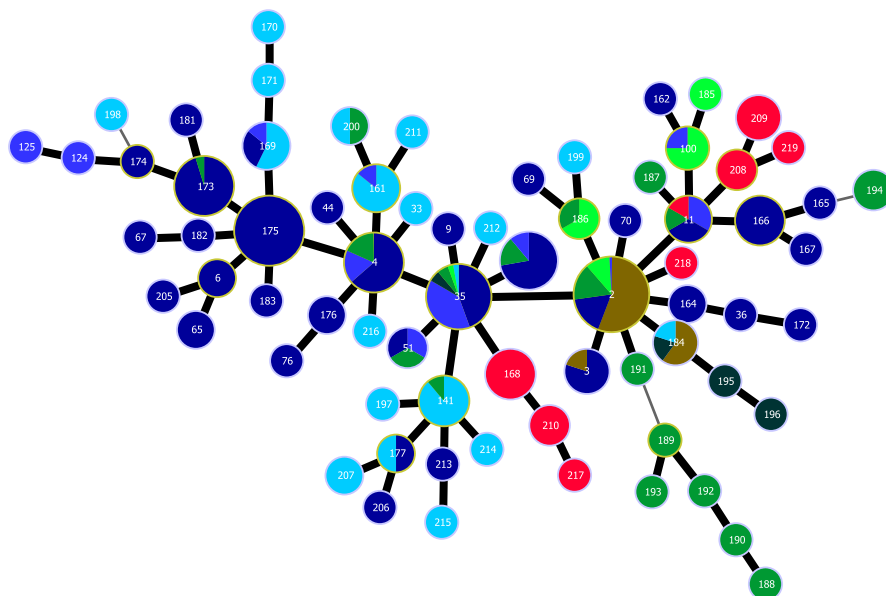

Supplement: s1 [file s1]

Strata GC1 GC2 GC3 GC4

Mandarin (*C. reticulata*) cv. Zanzibar

Survival probability

$p = 0.72$

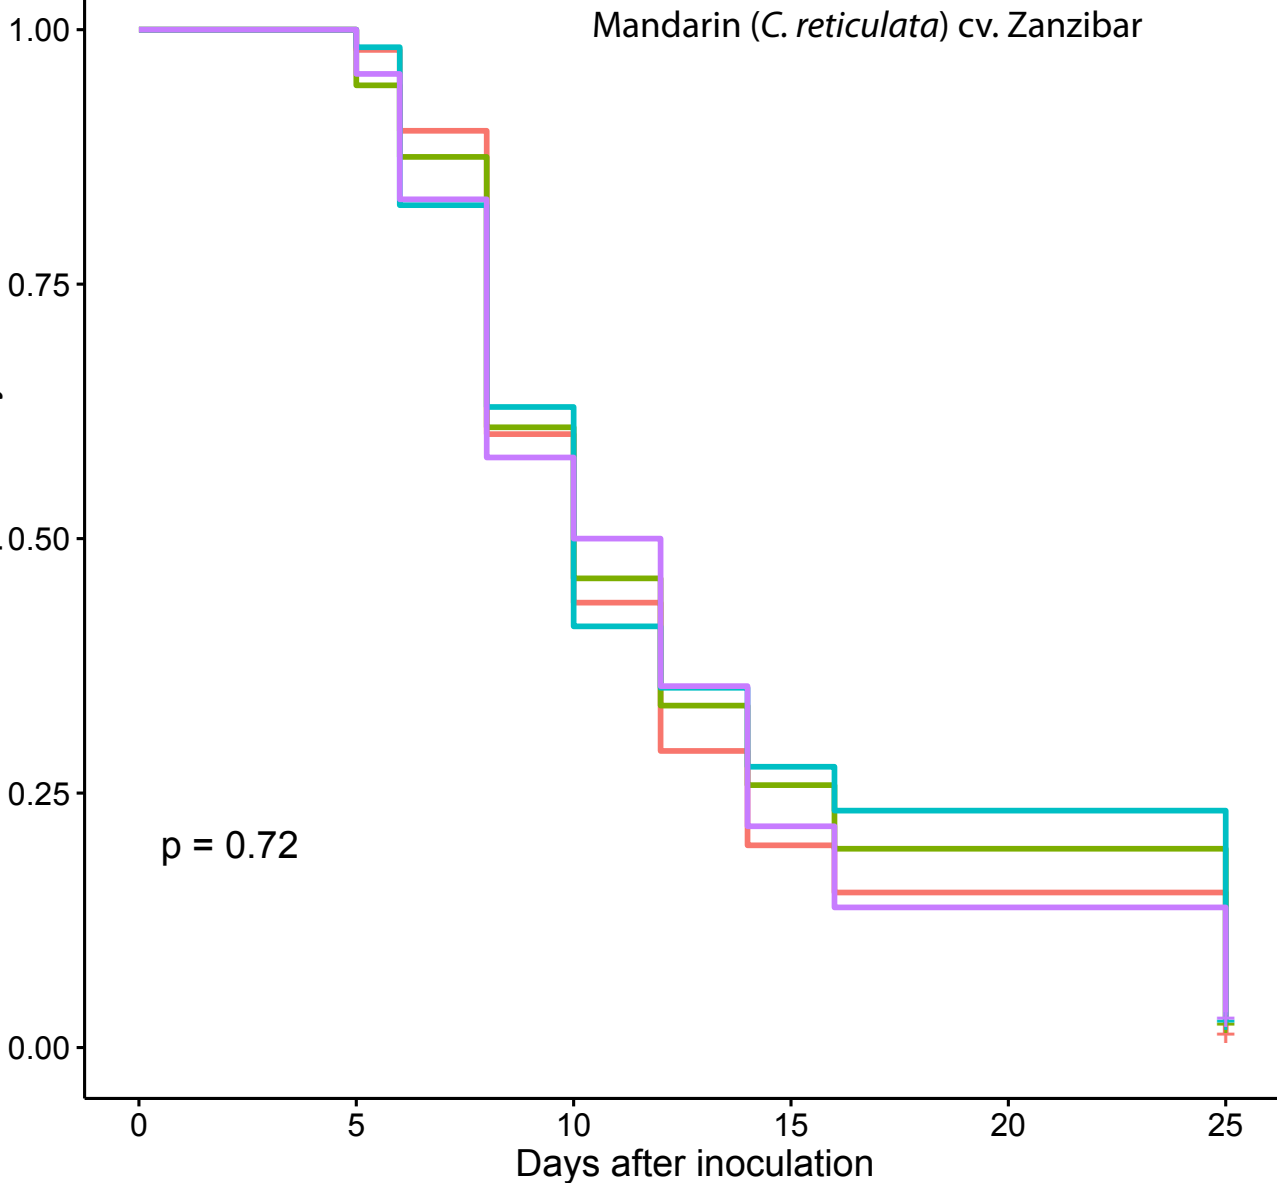

Supplement: s1 [file s1]

Strata + GC1 + GC2 + GC3 + GC4

Sweet orange (*C. x sinensis*) cv. New Hall navel

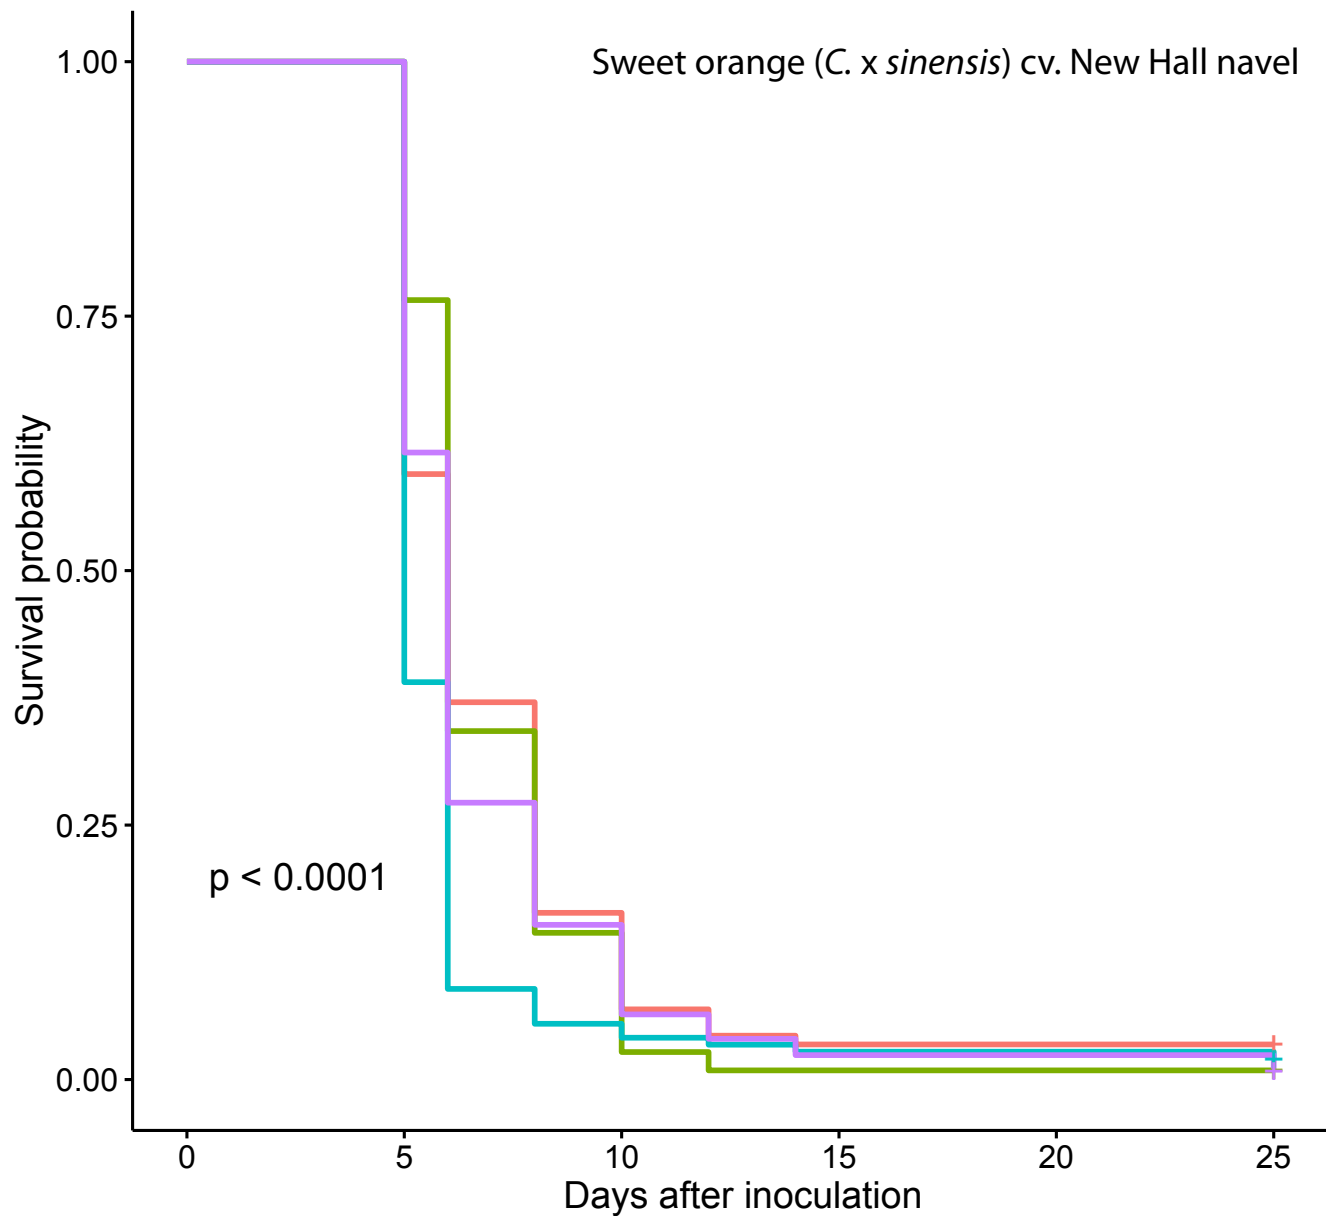

Supplement: s1 [file s1]
